# Supplementary material
Source: PubMed Central journal article supplement (PMC4369477)

n=5, YM155 n=6). For (D-F), mice were treated with vehicle (saline) or YM155 (10 mg/kg/day) via micro-osmotic pump (vehicle n=6, YM155 n=5). Caliper measurements were made twice a week to monitor tumor growth (A,D) and resulting tumors were collected, photographed (B,E), and weighed (C,F). Experiments were repeated 2 (A-C) and 3 times (D-F) respectively. Both intra-tumoral and systemic treatment with YM155 decreased tumor size over time compared to vehicle control. ( $p < 0.02$  for IT and pump YM155 tumor weight by ANOVA with post hoc student's t-test). Error bars represent SEM.

**Supplementary Figure 1. YM155 inhibits survivin expression in MB cells.** *Ptch* mutant tumor cells were treated with DMSO (D) or YM155 (Y) for 48 hours and analyzed for expression of *survivin* by real time PCR (A) and by western blotting after 24 hr. (B) YM155 dose in (B) is 1 $\mu$ M. YM155 decreases Survivin expression at both the RNA and protein level. Data are representative of 3 experiments.

**Supplementary Figure 2. LLP3 inhibits proliferation of *Ptch* mutant tumor cells.** (A) *Ptch* mutant tumor cells were treated with DMSO or multiple doses of LLP3 for 48 hr and pulsed with 3H-thymidine for 12 hr to measure proliferation. Treatment decreased proliferation in a dose-dependent manner ( $p < 0.05$  by ANOVA with post hoc student's ttest). Data represent mean  $\pm$  SD and are representative of 3 experiments.

**Supplementary Figure 3. Survivin antagonists kill GNPs but do not affect survival of post-mitotic neurons.** Granule Neuron Precursors (GNPs) were isolated from P7 wild type cerebella, split into two treatment groups, and plated in either SHH-containing media (A) or differentiation media (B). Cells in SHH-containing media were treated immediately with DMSO, YM155, or S12 for 48 hr and incubated with ethidium homodimer1 (EthD1) to mark dead/dying cells (A). Cells in differentiation media were cultured for 5 days, followed by treatment with DMSO, YM155, or S12 for 48 hr and incubation with EthD1 to mark dead/dying cells (B). Both S12 and YM155 caused GNP cell death at high doses ( $p < 0.01$

for high doses. NS for 50nM YM155 and 10 $\mu$ g/ml S12), but did not kill PMNs ( $P > 0.2$ , NS for all doses). Data represent mean  $\pm$  SD and are representative of 4 independent experiments.

**Supplementary Figure 4. Survivin is highly expressed in patient derived xenografts of MB.** RNA was isolated from human fetal cerebellum (hFC), adult cerebellum (hAC), and PDX tumors DMB012, DMB018, and ICB-984MB and analyzed for Survivin expression using real time PCR. Survivin is highly expressed in PDX tumors. Expression was not detected in hAC above background (RQ  $< 0.05$ ). Data are plotted relative to hFC and error bars represent 95% confidence interval calculated using sum of the squares method.

**A.**

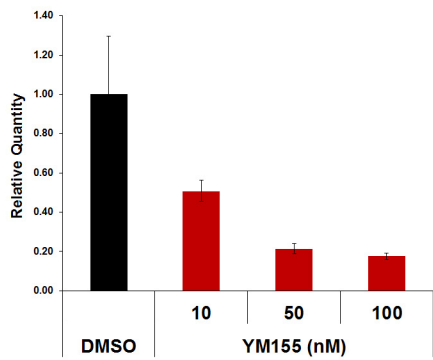

**B.**

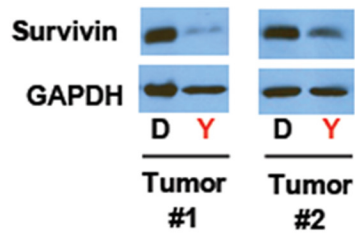

A.

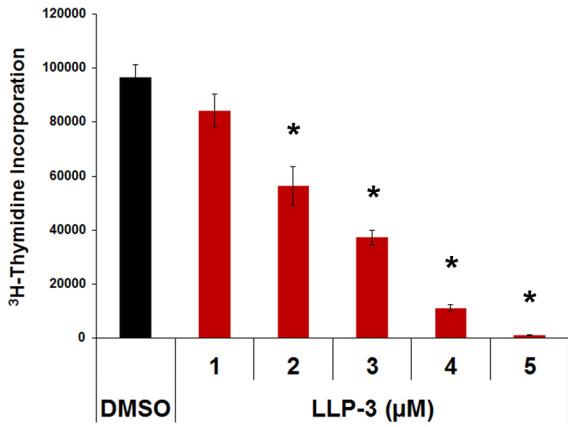

**A.**

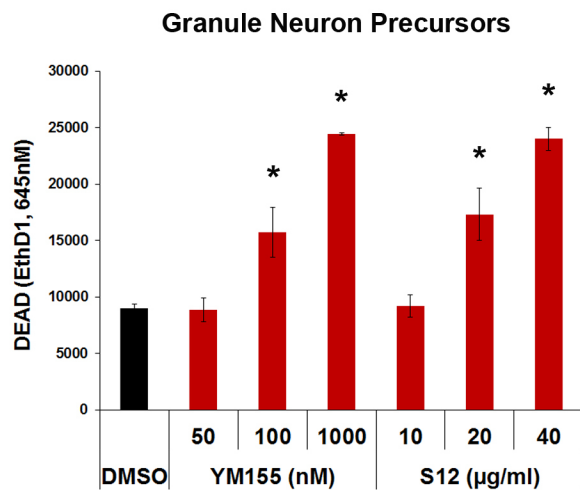

**B.**

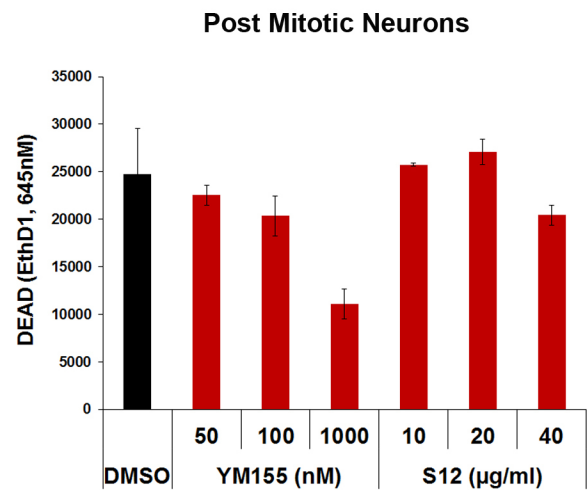

**A.**

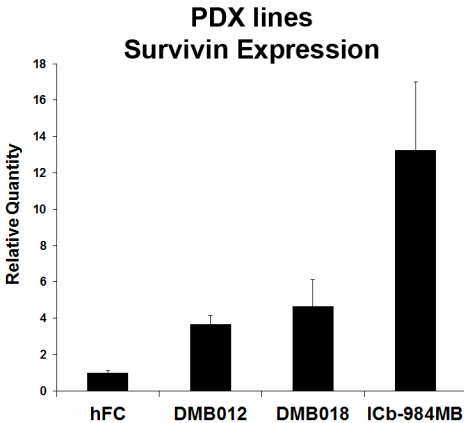

Supplement: NIHMS618179-supplement-supplement_1.pdf [file NIHMS618179-supplement-supplement_1.pdf]
